# Supplementary material for: Parents’ Awareness of Malocclusion and Orthodontic Consultation for Their Children: A Cross-Sectional Study
Source: MDPI journal article supplement (doi:10.3390/children9121974), 2022-12-16
Supplement: s1 [file s1]

**Table S1.** Kappa Coefficient for each item of the awareness questionnaire.

| Question                                                                                               | Kappa Coefficient |
|--------------------------------------------------------------------------------------------------------|-------------------|
| A beautiful smile is important for healthy development of the child's personality.                     | 0.87              |
| Yes                                                                                                    |                   |
| No                                                                                                     |                   |
| The causes of malocclusion in children are:                                                            | 0.89              |
| Heredity                                                                                               |                   |
| Bad oral habits like mouth breathing or thumb sucking                                                  |                   |
| Both                                                                                                   |                   |
| I don't know                                                                                           | 0.92              |
| If a primary tooth was lost prematurely due to decay. What should be done?                             |                   |
| Nothing. The permanent tooth will replace it                                                           |                   |
| Check if a space maintainer is needed                                                                  |                   |
| I don't know                                                                                           | 0.86              |
| Who will you first go to consult regarding orthodontic treatment for your child?                       |                   |
| General physician/pediatrician                                                                         |                   |
| General dentist                                                                                        |                   |
| Orthodontist                                                                                           | 0.84              |
| I don't know                                                                                           |                   |
| At what age should your child go to his/her first orthodontic consult?                                 |                   |
| 7 years                                                                                                |                   |
| 10 years                                                                                               |                   |
| 13 years                                                                                               | 0.80              |
| 18 years                                                                                               |                   |
| I don't know                                                                                           |                   |
| Do you think the age of a person when starting orthodontic treatment can affect the treatment outcome? |                   |
| No                                                                                                     | 0.88              |
| Yes                                                                                                    |                   |
| I don't know                                                                                           |                   |
| Do you think children can have orthodontic treatment during their growth period?                       | 0.88              |
| No                                                                                                     |                   |
| Yes                                                                                                    |                   |
| I don't know                                                                                           |                   |
